# Supplementary material for: LOTUS: Protocol for a double-blind placebo controlled randomized trial of hemp-derived cannabidiol for the treatment of cannabis use disorder
Source: PubMed Central journal article supplement (PMC11441658; doi:10.1371/journal.pone.0308262), 2024-09-30
Supplement: pone.0308262.s003.pdf [file pone.0308262.s003.pdf]

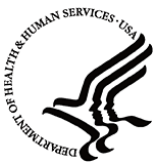

| Recipient Information                                                                                                                                                                                                                                                                                                                                                                                                                                                                                                                                                                                                                                                                                                                                          | Federal Award Information                                                                                                                                                                                                                                                                                                                                                                                                                                                                                                                                                                                                                                                                                                                                                                                                                                                                                                                                                                     |
|----------------------------------------------------------------------------------------------------------------------------------------------------------------------------------------------------------------------------------------------------------------------------------------------------------------------------------------------------------------------------------------------------------------------------------------------------------------------------------------------------------------------------------------------------------------------------------------------------------------------------------------------------------------------------------------------------------------------------------------------------------------|-----------------------------------------------------------------------------------------------------------------------------------------------------------------------------------------------------------------------------------------------------------------------------------------------------------------------------------------------------------------------------------------------------------------------------------------------------------------------------------------------------------------------------------------------------------------------------------------------------------------------------------------------------------------------------------------------------------------------------------------------------------------------------------------------------------------------------------------------------------------------------------------------------------------------------------------------------------------------------------------------|
| <p><b>1. Recipient Name</b><br/>THE REGENTS OF THE UNIVERSITY OF COLORADO<br/>3100 MARINE ST<br/>STE 481 572 UCB<br/>BOULDER, CO 80309</p> <p><b>2. Congressional District of Recipient</b><br/>02</p> <p><b>3. Payment System Identifier (ID)</b><br/>1846000555A2</p> <p><b>4. Employer Identification Number (EIN)</b><br/>846000555</p> <p><b>5. Data Universal Numbering System (DUNS)</b><br/>007431505</p> <p><b>6. Recipient's Unique Entity Identifier</b><br/>SPVKK1RC2MZ3</p> <p><b>7. Project Director or Principal Investigator</b><br/>L. Cinnamon Bidwell, PHD (Contact)<br/>Assistant Professor<br/>lcb@colorado.edu<br/>781-608-3711</p> <p><b>8. Authorized Official</b><br/>Tessa Brandt<br/>tessa.brandt@colorado.edu<br/>303-735-8462</p> | <p><b>11. Award Number</b><br/>1R01DA059234-01A1</p> <p><b>12. Unique Federal Award Identification Number (FAIN)</b><br/>R01DA059234</p> <p><b>13. Statutory Authority</b><br/>42 USC 241 42 CFR 52</p> <p><b>14. Federal Award Project Title</b><br/>Hemp-derived Cannabidiol for the treatment of cannabis use disorder in concentrate users: A double-blind placebo-controlled randomized trial</p> <p><b>15. Assistance Listing Number</b><br/>93.279</p> <p><b>16. Assistance Listing Program Title</b><br/>Drug Abuse and Addiction Research Programs</p> <p><b>17. Award Action Type</b><br/>New Competing</p> <p><b>18. Is the Award R&amp;D?</b><br/>Yes</p>                                                                                                                                                                                                                                                                                                                         |
| <p><b>Federal Agency Information</b></p> <p><b>9. Awarding Agency Contact Information</b><br/>Pamela G. Fleming<br/>Grants Management Officer<br/>NATIONAL INSTITUTE ON DRUG ABUSE<br/>pfleming@mail.nih.gov<br/>301-480-1159</p> <p><b>10. Program Official Contact Information</b><br/>Aidan Hampson<br/>Program Official<br/>NATIONAL INSTITUTE ON DRUG ABUSE<br/>aidan.hampson@nih.gov<br/>301-827-5925</p>                                                                                                                                                                                                                                                                                                                                                | <p><b>19. Budget Period Start Date</b> 09/15/2023 – <b>End Date</b> 07/31/2024</p> <p><b>20. Total Amount of Federal Funds Obligated by this Action</b> \$741,850<br/>             20 a. Direct Cost Amount \$493,913<br/>             20 b. Indirect Cost Amount \$247,937</p> <p><b>21. Authorized Carryover</b></p> <p><b>22. Offset</b></p> <p><b>23. Total Amount of Federal Funds Obligated this budget period</b> \$741,850</p> <p><b>24. Total Approved Cost Sharing or Matching, where applicable</b> \$0</p> <p><b>25. Total Federal and Non-Federal Approved this Budget Period</b> \$741,850</p> <hr/> <p><b>26. Project Period Start Date</b> 09/15/2023 – <b>End Date</b> 07/31/2028</p> <p><b>27. Total Amount of the Federal Award including Approved Cost Sharing or Matching this Project Period</b> \$741,850</p> <p><b>28. Authorized Treatment of Program Income</b><br/>Additional Costs</p> <p><b>29. Grants Management Officer - Signature</b><br/>Carol Alderson</p> |
| <p><b>30. Remarks</b><br/>Acceptance of this award, including the "Terms and Conditions," is acknowledged by the recipient when funds are drawn down or otherwise requested from the grant payment system.</p>                                                                                                                                                                                                                                                                                                                                                                                                                                                                                                                                                 |                                                                                                                                                                                                                                                                                                                                                                                                                                                                                                                                                                                                                                                                                                                                                                                                                                                                                                                                                                                               |

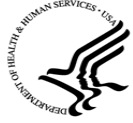

RESEARCH  
Department of Health and Human Services  
National Institutes of Health

Notice of Award

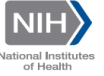

NATIONAL INSTITUTE ON DRUG ABUSE

---

**SECTION I – AWARD DATA – 1R01DA059234-01A1**

**Principal Investigator(s):**

L. Cinnamon Bidwell (contact), PHD  
KENT E. HUTCHISON, PHD

**Award e-mailed to:** ocg@colorado.edu

Dear Authorized Official:

The National Institutes of Health hereby awards a grant in the amount of \$741,850 (see “Award Calculation” in Section I and “Terms and Conditions” in Section III) to UNIVERSITY OF COLORADO in support of the above referenced project. This award is pursuant to the authority of 42 USC 241 42 CFR 52 and is subject to the requirements of this statute and regulation and of other referenced, incorporated or attached terms and conditions.

Acceptance of this award, including the "Terms and Conditions," is acknowledged by the recipient when funds are drawn down or otherwise requested from the grant payment system.

Each publication, press release, or other document about research supported by an NIH award must include an acknowledgment of NIH award support and a disclaimer such as “Research reported in this publication was supported by the National Institute On Drug Abuse of the National Institutes of Health under Award Number R01DA059234. The content is solely the responsibility of the authors and does not necessarily represent the official views of the National Institutes of Health.” Prior to issuing a press release concerning the outcome of this research, please notify the NIH awarding IC in advance to allow for coordination.

Award recipients must promote objectivity in research by establishing standards that provide a reasonable expectation that the design, conduct and reporting of research funded under NIH awards will be free from bias resulting from an Investigator’s Financial Conflict of Interest (FCOI), in accordance with the 2011 revised regulation at 42 CFR Part 50 Subpart F. The Institution shall submit all FCOI reports to the NIH through the eRA Commons FCOI Module. The regulation does not apply to Phase I Small Business Innovative Research (SBIR) and Small Business Technology Transfer (STTR) awards. Consult the NIH website <http://grants.nih.gov/grants/policy/coi/> for a link to the regulation and additional important information.

If you have any questions about this award, please direct questions to the Federal Agency contacts.

Sincerely yours,

Carol Alderson  
Grants Management Officer  
NATIONAL INSTITUTE ON DRUG ABUSE

Additional information follows

---

**Cumulative Award Calculations for this Budget Period (U.S. Dollars)**

|                                                          |                  |
|----------------------------------------------------------|------------------|
| Salaries and Wages                                       | \$237,798        |
| Fringe Benefits                                          | \$78,108         |
| Personnel Costs (Subtotal)                               | \$315,906        |
| Materials & Supplies                                     | \$10,374         |
| Other                                                    | \$109,696        |
| Subawards/Consortium/Contractual Costs                   | \$55,087         |
| ADP/Computer Services                                    | \$2,850          |
| <br>                                                     |                  |
| Federal Direct Costs                                     | \$493,913        |
| Federal F&A Costs                                        | \$247,937        |
| Approved Budget                                          | \$741,850        |
| Total Amount of Federal Funds Authorized (Federal Share) | \$741,850        |
| <b>TOTAL FEDERAL AWARD AMOUNT</b>                        | <b>\$741,850</b> |
| <br>                                                     |                  |
| <b>AMOUNT OF THIS ACTION (FEDERAL SHARE)</b>             | <b>\$741,850</b> |

| SUMMARY TOTALS FOR ALL YEARS (for this Document Number) |            |                   |
|---------------------------------------------------------|------------|-------------------|
| YR                                                      | THIS AWARD | CUMULATIVE TOTALS |
| 1                                                       | \$741,850  | \$741,850         |
| 2                                                       | \$725,910  | \$725,910         |
| 3                                                       | \$710,354  | \$710,354         |
| 4                                                       | \$694,985  | \$694,985         |
| 5                                                       | \$674,798  | \$674,798         |

Recommended future year total cost support, subject to the availability of funds and satisfactory progress of the project

**Fiscal Information:**

**Payment System Identifier:** 1846000555A2  
**Document Number:** RDA059234A  
**PMS Account Type:** P (Subaccount)  
**Fiscal Year:** 2023

| IC | CAN     | 2023      | 2024      | 2025      | 2026      | 2027      |
|----|---------|-----------|-----------|-----------|-----------|-----------|
| DA | 8472630 | \$741,850 | \$725,910 | \$710,354 | \$694,985 | \$674,798 |

Recommended future year total cost support, subject to the availability of funds and satisfactory progress of the project

**NIH Administrative Data:**

**PCC:** CC/AJH / **OC:** 41021 / **Released:** Alderson, Carol 08/30/2023  
**Award Processed:** 09/08/2023 12:21:29 AM

---

**SECTION II – PAYMENT/HOTLINE INFORMATION – 1R01DA059234-01A1**

For payment and HHS Office of Inspector General Hotline information, see the NIH Home Page at <http://grants.nih.gov/grants/policy/awardconditions.htm>

---

**SECTION III – STANDARD TERMS AND CONDITIONS – 1R01DA059234-01A1**

This award is based on the application submitted to, and as approved by, NIH on the above-titled project and is subject to the terms and conditions incorporated either directly or by reference in the following:

- a. The grant program legislation and program regulation cited in this Notice of Award.
- b. Conditions on activities and expenditure of funds in other statutory requirements, such as those included in appropriations acts.
- c. 45 CFR Part 75.
- d. National Policy Requirements and all other requirements described in the NIH Grants Policy Statement, including addenda in effect as of the beginning date of the budget period.
- e. Federal Award Performance Goals: As required by the periodic report in the RPPR or in the final progress report when applicable.
- f. This award notice, INCLUDING THE TERMS AND CONDITIONS CITED BELOW.

(See NIH Home Page at <http://grants.nih.gov/grants/policy/awardconditions.htm> for certain references cited above.)

**Research and Development (R&D):** All awards issued by the National Institutes of Health (NIH) meet the definition of “Research and Development” at 45 CFR Part§ 75.2. As such, auditees should identify NIH awards as part of the R&D cluster on the Schedule of Expenditures of Federal Awards (SEFA). The auditor should test NIH awards for compliance as instructed in Part V, Clusters of Programs. NIH recognizes that some awards may have another classification for purposes of indirect costs. The auditor is not required to report the disconnect (i.e., the award is classified as R&D for Federal Audit Requirement purposes but non-research for indirect cost rate purposes), unless the auditee is charging indirect costs at a rate other than the rate(s) specified in the award document(s).

An unobligated balance may be carried over into the next budget period without Grants Management Officer prior approval.

This grant is subject to Streamlined Noncompeting Award Procedures (SNAP).

This award is subject to the requirements of 2 CFR Part 25 for institutions to obtain a unique entity identifier (UEI) and maintain an active registration in the System for Award Management (SAM). Should a consortium/subaward be issued under this award, a UEI requirement must be included. See <http://grants.nih.gov/grants/policy/awardconditions.htm> for the full NIH award term implementing this requirement and other additional information.

This award has been assigned the Federal Award Identification Number (FAIN) R01DA059234. Recipients must document the assigned FAIN on each consortium/subaward issued under this award.

Based on the project period start date of this project, this award is likely subject to the Transparency Act subaward and executive compensation reporting requirement of 2 CFR Part 170. There are conditions that may exclude this award; see <http://grants.nih.gov/grants/policy/awardconditions.htm> for additional award applicability information.

In accordance with P.L. 110-161, compliance with the NIH Public Access Policy is now mandatory. For more information, see NOT-OD-08-033 and the Public Access website: <http://publicaccess.nih.gov/>.

This award provides support for one or more clinical trials. By law (Title VIII, Section 801 of [Public Law 110-85](#)), the “responsible party” must register “applicable clinical trials” on the [ClinicalTrials.gov Protocol Registration System Information Website](#). NIH encourages registration of all trials whether required under the law or not. For more information, see [http://grants.nih.gov/ClinicalTrials\\_fdaaa/](http://grants.nih.gov/ClinicalTrials_fdaaa/)

Recipients must administer the project in compliance with federal civil rights laws that prohibit discrimination on the basis of race, color, national origin, disability, age, and comply with applicable conscience protections. The recipient will comply with applicable laws that prohibit discrimination on the

basis of sex, which includes discrimination on the basis of gender identity, sexual orientation, and pregnancy. Compliance with these laws requires taking reasonable steps to provide meaningful access to persons with limited English proficiency and providing programs that are accessible to and usable by persons with disabilities. The HHS Office for Civil Rights provides guidance on complying with civil rights laws enforced by HHS. See <https://www.hhs.gov/civil-rights/for-providers/provider-obligations/index.html> and <https://www.hhs.gov/>.

- Recipients of FFA must ensure that their programs are accessible to persons with limited English proficiency. For guidance on meeting the legal obligation to take reasonable steps to ensure meaningful access to programs or activities by limited English proficient individuals, see <https://www.hhs.gov/civil-rights/for-individuals/special-topics/limited-english-proficiency/fact-sheet-guidance/index.html> and <https://www.lep.gov>.
- For information on an institution's specific legal obligations for serving qualified individuals with disabilities, including providing program access, reasonable modifications, and to provide effective communication, see <http://www.hhs.gov/ocr/civilrights/understanding/disability/index.html>.
- HHS funded health and education programs must be administered in an environment free of sexual harassment; see <https://www.hhs.gov/civil-rights/for-individuals/sex-discrimination/index.html>. For information about NIH's commitment to supporting a safe and respectful work environment, who to contact with questions or concerns, and what NIH's expectations are for institutions and the individuals supported on NIH-funded awards, please see <https://grants.nih.gov/grants/policy/harassment.htm>.
- For guidance on administering programs in compliance with applicable federal religious nondiscrimination laws and applicable federal conscience protection and associated anti-discrimination laws, see <https://www.hhs.gov/conscience/conscience-protections/index.html> and <https://www.hhs.gov/conscience/religious-freedom/index.html>.

In accordance with the regulatory requirements provided at 45 CFR 75.113 and Appendix XII to 45 CFR Part 75, recipients that have currently active Federal grants, cooperative agreements, and procurement contracts with cumulative total value greater than \$10,000,000 must report and maintain information in the System for Award Management (SAM) about civil, criminal, and administrative proceedings in connection with the award or performance of a Federal award that reached final disposition within the most recent five-year period. The recipient must also make semiannual disclosures regarding such proceedings. Proceedings information will be made publicly available in the designated integrity and performance system (currently the Federal Awardee Performance and Integrity Information System (FAPIIS)). Full reporting requirements and procedures are found in Appendix XII to 45 CFR Part 75. This term does not apply to NIH fellowships.

**Treatment of Program Income:**

Additional Costs

---

**SECTION IV – DA SPECIFIC AWARD CONDITIONS – 1R01DA059234-01A1**

Clinical Trial Indicator: Yes

This award supports one or more NIH-defined Clinical Trials. See the NIH Grants Policy Statement Section 1.2 for NIH definition of Clinical Trial.

**This award contains grant-specific restrictions. These restrictions may only be lifted by a revised Notice of Award (NoA).**

**RESTRICTED AWARD**

No funds may be expended for this grant until NIDA has received notice that -

1) Thirty days have elapsed since issue of the Food and Drug Administration (FDA) acknowledgement of receipt of the Investigational New Drugs (INDs) associated with both the full spectrum and broad-spectrum hemp formulations to be used in this study

2) During the 30-day period following FDA acknowledgement of receipt, no clinical hold, or any request from FDA to extend the FDA evaluation period has been received pertaining to the acceptability of the IND submissions.

A revised Notice of Award (NoA) will be issued, once this has occurred to lift the restriction on the funds, accordingly.

#### **HUMAN SUBJECTS RESTRICTED- IRB APPROVAL REQUIRED**

This award is issued without a currently valid certification of Institutional Review Board (IRB) approval for this project with the following restriction: Only activities that are clearly severable and independent from activities that involve human subjects may be conducted pending NIDA's acceptance of the certification of IRB approval. No funds may be drawn down from the payment system and no obligations may be made against Federal funds for research involving human subjects at any site engaged in such research for any period not covered by an Office for Human Research Protections Assurance and an IRB approval consistent with the requirements of 45 CFR Part 46. **IRB approval must be submitted within 60 days from the issue date of the Notice of Award.**

See the NIH Grants Policy Statement, section on Human Subjects Protections <http://grants.nih.gov/policy/nihgps/index.htm> for specific requirements related to the protection of human subjects, which are applicable to this term and condition of award.

#### **HUMAN SUBJECTS RESTRICTION- DATA AND SAFETY MONITORING PLAN REQUIRED**

This award is contingent upon receipt and written approval, **within 60 days from the issue date of the Notice of Award**, by the NIDA Program Official of the detailed Data and Safety Monitoring Plan (DSMP) for the trial(s) to be conducted under this award. The elements of the DSMP are delineated in the DSMP guidelines provided by NIH and NIDA, respectively. The Authorized Organizational Representative should submit the DSMP to the NIDA Program Official and Grants Management Specialist listed in eRA Commons. Recruitment of subjects for the trial supported by this award cannot start until the NIDA Program Official approves the DSMP and a revised Notice of Award is issued to remove the restriction.

---

#### **FY2023 FUNDING**

The award amount for the current year is based upon IRG/Council recommendations, cost analysis, program priorities and availability of funds.

#### **BUDGET PERIOD**

Future year anniversary dates for this grant will be August 1 and the Research Performance Progress Report (RPPR) is due on June 15.

#### **MULTIPLE PI**

The following principal investigators (PIs) are associated with this project:

- L. Cinnamon Bidwell, University of Colorado,
- Kent E. Hutchinson, University of Colorado, Anschutz

Dr. Bidwell is the contact PI for correspondence purposes. As this grant has multiple PIs, all NIH Grant policies regarding multiple PIs, including, but, not limited to all prior approval requirements, must be followed accordingly, see NIH Grants Policy Statement, section on Multiple Program Director/Principal Investigators, found at <http://grants.nih.gov/policy/nihgps/index.htm>.

#### **CONSORTIUM ACTIVITY**

This award includes funds awarded for consortium activities. Consortia are to be established and administered as described in the NIH Grants Policy Statement (NIH GPS), Section on Consortium Agreements - <http://grants.nih.gov/policy/nihgps/index.htm>.

The recipient is reminded of the *NIH Updated Policy Guidance for Subaward/Consortium Written Agreements* as published in the NIH Guide notice NOT-OD-23-133 on May 19, 2023 with an effective date of October 1, 2023. The notice can be found here: <https://grants.nih.gov/grants/guide/notice-files/NOT-OD-23-133.html>

**NIH SALARY CAP**

None of the funds in this award shall be used to pay the salary of an individual at a rate in excess of the current salary cap. Therefore, this budget period and/or future budgeted years are adjusted accordingly, if applicable. Current salary cap levels can be found at the following URL: [http://grants2.nih.gov/grants/policy/salcap\\_summary.htm](http://grants2.nih.gov/grants/policy/salcap_summary.htm).

**NIDA TERMS**

In conjunction with the Acknowledgment of Federal Funding Requirement (as specified in the NIH Grants Policy Statement, Appropriation Mandates <http://grants.nih.gov/policy/nihgps/index.htm>), in order to most effectively disseminate research results, advance notice should be given to NIDA that research findings are about to be published so that we may coordinate accurate and timely release to the media. This information will be embargoed until the publication date. Please see the NIDA Special Considerations Page for guidance on coordination with the NIDA Press Office at <https://www.drugabuse.gov/funding/special-considerations-for-nida-funding>, or contact the NIDA Press Office at [media@nida.nih.gov](mailto:media@nida.nih.gov).

Please see Special Considerations for NIDA Funding Opportunities and Awards at <https://www.drugabuse.gov/funding/special-considerations-for-nida-funding>.

Data Management and Sharing Policy: Applicable

This project is expected to generate scientific data. Therefore, the [Final NIH Policy for Data Management and Sharing](#) applies. The approved Data Management and Sharing (DMS) Plan is hereby incorporated as a term and condition of award, and the recipient shall manage and disseminate scientific data in accordance with the approved plan. Any significant changes to the DMS Plan (e.g., new scientific direction, a different data repository, or a timeline revision) require NIH prior approval. Failure to comply with the approved DMS plan may result in suspension and/or termination of this award, withholding of support, audit disallowances, and/or other appropriate action. See NIH Grants Policy Statement [Section 8.2.3](#) for more information on data management and sharing expectations.

| Budget    | Year 1  | Year 2  | Year 3  | Year 4   | Year 5   |
|-----------|---------|---------|---------|----------|----------|
| DMS Costs | \$9,207 | \$9,536 | \$9,878 | \$10,233 | \$10,601 |

**SPREADSHEET SUMMARY**

**AWARD NUMBER:** 1R01DA059234-01A1

**INSTITUTION:** UNIVERSITY OF COLORADO

| Budget                                 | Year 1    | Year 2    | Year 3    | Year 4    | Year 5    |
|----------------------------------------|-----------|-----------|-----------|-----------|-----------|
| Salaries and Wages                     | \$237,798 | \$237,798 | \$229,862 | \$222,537 | \$235,356 |
| Fringe Benefits                        | \$78,108  | \$78,108  | \$75,040  | \$72,208  | \$77,164  |
| Personnel Costs (Subtotal)             | \$315,906 | \$315,906 | \$304,902 | \$294,745 | \$312,520 |
| Materials & Supplies                   | \$10,374  | \$10,374  | \$7,192   | \$7,192   | \$5,909   |
| Travel                                 |           | \$5,455   | \$7,476   | \$7,476   | \$7,476   |
| Other                                  | \$109,696 | \$92,630  | \$93,430  | \$93,767  | \$64,376  |
| Subawards/Consortium/Contractual Costs | \$55,087  | \$55,088  | \$55,088  | \$55,088  | \$55,088  |
| Publication Costs                      |           | \$1,425   | \$2,850   | \$2,850   | \$2,850   |

|                       |           |           |           |           |           |
|-----------------------|-----------|-----------|-----------|-----------|-----------|
| ADP/Computer Services | \$2,850   | \$2,850   | \$2,850   | \$2,850   | \$2,850   |
| TOTAL FEDERAL DC      | \$493,913 | \$483,728 | \$473,788 | \$463,968 | \$451,069 |
| TOTAL FEDERAL F&A     | \$247,937 | \$242,182 | \$236,566 | \$231,017 | \$223,729 |
| TOTAL COST            | \$741,850 | \$725,910 | \$710,354 | \$694,985 | \$674,798 |

| Facilities and Administrative Costs | Year 1    | Year 2    | Year 3    | Year 4    | Year 5    |
|-------------------------------------|-----------|-----------|-----------|-----------|-----------|
| F&A Cost Rate 1                     | 56.5%     | 56.5%     | 56.5%     | 56.5%     | 56.5%     |
| F&A Cost Base 1                     | \$438,826 | \$428,640 | \$418,700 | \$408,880 | \$395,981 |
| F&A Costs 1                         | \$247,937 | \$242,182 | \$236,566 | \$231,017 | \$223,729 |
