# Supplementary material for: LOTUS: Protocol for a double-blind placebo controlled randomized trial of hemp-derived cannabidiol for the treatment of cannabis use disorder
Source: PubMed Central journal article supplement (PMC11441658; doi:10.1371/journal.pone.0308262), 2024-09-30
Supplement: pone.0308262.s006.pdf [file pone.0308262.s006.pdf]

**MEETING ROSTER**  
**Interventions to Prevent and Treat Addictions Study Section**  
**Risk, Prevention and Health Behavior Integrated Review Group**  
**CENTER FOR SCIENTIFIC REVIEW**  
**IPTA**  
**06/22/2023 - 06/23/2023**

**Notice of NIH Policy to All Applicants:** Meeting rosters are provided for information purposes only. Applicant investigators and institutional officials must not communicate directly with study section members about an application before or after the review. Failure to observe this policy will create a serious breach of integrity in the peer review process, and may lead to actions outlined in [NOT-OD-22-044](#), including removal of the application from immediate review.

**CHAIRPERSON(S)**

PIPER, MEGAN E, PHD  
PROFESSOR  
DEPARTMENT OF MEDICINE  
UNIVERSITY OF WISCONSIN-MADISON  
MADISON, WI 53711

GARRISON, KATHLEEN A, PHD  
ASSISTANT PROFESSOR  
DEPARTMENT OF PSYCHIATRY  
YALE SCHOOL OF MEDICINE  
NEW HAVEN, CT 06510

**MEMBERS**

ALETRARIS, LYDIA, PHD \*  
ASSOCIATE RESEARCH SCIENTIST  
SCHOOL OF SOCIAL WORK  
UNIVERSITY OF GEORGIA  
ATHENS, GA 30602

GRYCZYNSKI, JAN, PHD  
SENIOR RESEARCH SCIENTIST  
FRIENDS RESEARCH INSTITUTE  
BALTIMORE, MD 21201

BERNSTEIN, STEVEN L, MD  
PROFESSOR  
DEPARTMENT OF EMERGENCY MEDICINE  
GEISEL SCHOOL OF MEDICINE AT DARTMOUTH  
LEBANON, NH 03756

HAGLE, HOLLY \*  
ASSOCIATE RESEARCH PROFESSOR  
MISSOURI CENTER FOR ADDICTION RESEARCH  
AND ENGAGEMENT  
COLLEGE OF ARTS AND SCIENCE  
UNIVERSITY OF MISSOURI  
KANSAS CITY, MO 64110

BINSWANGER, INGRID A, MD  
SENIOR CLINICIAN INVESTIGATOR  
INSTITUTE FOR HEALTH RESEARCH  
KAISER PERMANENTE  
AURORA, CO 80014

JAGER, JUSTIN O, PHD \*  
ASSOCIATE PROFESSOR  
COLLEGE OF HEALTH SOLUTIONS  
THE SANFORD SCHOOL  
ARIZONA STATE UNIVERSITY  
TEMPE, AZ 85281

BRICKER, JONATHAN B, PHD  
PROFESSOR  
DIVISION OF PUBLIC HEALTH SCIENCES  
FRED HUTCHINSON CANCER RESEARCH CENTER  
UNIVERSITY OF WASHINGTON  
SEATTLE, WA 98109

KELLEY, MICHELLE L, PHD \*  
PROFESSOR AND CHAIR  
DEPARTMENT OF PSYCHOLOGY  
COLLEGE OF SCIENCES  
OLD DOMINION UNIVERSITY  
NORFOLK, VA 23322

CLAUS, ERIC D, PHD  
ASSOCIATE PROFESSOR  
DEPARTMENT OF BIOBEHAVIORAL HEALTH  
THE PENNSYLVANIA STATE UNIVERSITY  
UNIVERSITY PARK, PA 16802

KOWALCHUK, ALICIA ANN, DO \*  
ASSOCIATE PROFESSOR  
BAYLOR COLLEGE OF MEDICINE  
HOUSTON, TX 77030

FENDRICH, MICHAEL, PHD \*  
SCIENTIFIC DIRECTOR  
ADVOCATE AURORA RESEARCH INSTITUTE  
MILWAUKEE, WI 53211

LANGDON, KIRSTEN JOHNSON, PHD \*  
ASSISTANT PROFESSOR  
DEPARTMENT OF BEHAVIORAL AND SOCIAL SCIENCES  
DEPARTMENT OF PSYCHIATRY AND HUMAN BEHAVIOR  
BROWN UNIVERSITY  
PROVIDENCE, RI 02912

GAINES, TOMMI LYNN, DRPH \*  
ASSOCIATE PROFESSOR  
DIVISION OF GLOBAL PUBLIC HEALTH  
DEPARTMENT OF MEDICINE  
SCHOOL OF MEDICINE  
UNIVERSITY OF CALIFORNIA, SAN DIEGO  
LA JOLLA, CA 92093

LEDGERWOOD, DAVID M, PHD  
PROFESSOR  
DEPARTMENT OF PSYCHIATRY  
AND BEHAVIORAL NEUROSCIENCES  
SCHOOL OF MEDICINE  
WAYNE STATE UNIVERSITY  
DETROIT, MI 48201

**MEETING ROSTER**  
**Interventions to Prevent and Treat Addictions Study Section**  
**Risk, Prevention and Health Behavior Integrated Review Group**  
**CENTER FOR SCIENTIFIC REVIEW**  
**IPTA**  
**06/22/2023 - 06/23/2023**

**Notice of NIH Policy to All Applicants:** Meeting rosters are provided for information purposes only. Applicant investigators and institutional officials must not communicate directly with study section members about an application before or after the review. Failure to observe this policy will create a serious breach of integrity in the peer review process, and may lead to actions outlined in [NOT-OD-22-044](#), including removal of the application from immediate review.

MATHEW, AMANDA R, PHD \*  
ASSISTANT PROFESSOR  
DEPARTMENT OF PREVENTIVE MEDICINE  
RUSH UNIVERSITY  
CHICAGO, IL 60612

NAPPER, LUCY ELIZABETH, PHD \*  
ASSOCIATE PROFESSOR  
DEPARTMENT OF PSYCHOLOGY  
COLLEGE OF ARTS AND SCIENCES  
LEHIGH UNIVERSITY  
BETHLEHEM, PA 18015

MCHUGH, REBECCA KATHRYN, PHD  
ASSOCIATE PROFESSOR  
DEPARTMENT OF PSYCHIATRY  
HARVARD MEDICAL SCHOOL  
BELMONT, MA 02478

POWELL, TERRINIEKA WILLIAMS, PHD \*  
ASSOCIATE PROFESSOR  
POPULATION, FAMILY AND REPRODUCTIVE HEALTH  
BLOOMBERG SCHOOL OF PUBLIC HEALTH  
JOHNS HOPKINS UNIVERSITY  
BALTIMORE, MD 21205

MCNEELY, JENNIFER, MD  
ASSOCIATE PROFESSOR  
DEPARTMENTS OF POPULATION HEALTH AND MEDICINE  
GROSSMAN SCHOOL OF MEDICINE  
NEW YORK UNIVERSITY  
NEW YORK, NY 10016

RAIFF, BETHANY R, PHD \*  
PROFESSOR  
DEPARTMENT OF PSYCHOLOGY  
COLLEGE OF SCIENCE AND MATHEMATICS  
ROWAN UNIVERSITY  
GLASSBORO, NJ 08028

MCPHERSON, STERLING M, PHD  
DIRECTOR AND PROFESSOR  
PROGRAM OF EXCELLENCE IN ADDICTIONS RESEARCH  
DEPARTMENT OF COMMUNITY AND BEHAVIORAL HEALTH  
ELSON S. FLOYD COLLEGE OF MEDICINE  
WASHINGTON STATE UNIVERSITY  
SPOKANE, WA 99210

SADASIVAM, RAJANI, PHD  
PROFESSOR  
DIVISION OF HEALTH AND IMPLEMENTATION SCIENCE  
DEPARTMENT OF POPULATION AND QUANTITATIVE  
HEALTH SCIENCES  
UNIVERSITY OF MASSACHUSETTS MEDICAL SCHOOL  
WORCESTER, MA 01605

MILLS, SARAH, PHD, MPH \*  
ASSISTANT PROFESSOR  
DEPARTMENT OF HEALTH BEHAVIOR  
GILLINGS SCHOOL OF GLOBAL PUBLIC HEALTH  
UNIVERSITY OF NORTH CAROLINA  
CHAPEL HILL, NC 27599

SARAIYA, TANYA CHANDRESH, PHD \*  
ASSISTANT PROFESSOR  
DEPARTMENT OF ALCOHOL & SUBSTANCE USE STUDIES  
GRADUATE SCHOOL OF APPLIED AND PROFESSIONAL  
PSYCHOLOGY  
RUTGERS UNIVERSITY  
PISCATAWAY, NJ 08854

MONTGOMERY, LATRICE, PHD  
DIRECTOR OF CLINICAL RESEARCH AT RIA HEALTH,  
ADJUNCT ASSOCIATE PROFESSOR  
DEPARTMENT OF PSYCHIATRY AND  
BEHAVIORAL NEUROSCIENCE  
COLLEGE OF MEDICINE  
UNIVERSITY OF CINCINNATI  
CINCINNATI, OH 45229

SHEFFER, CHRISTINE ELIZABETH, PHD  
PROFESSOR  
DEPARTMENT OF HEALTH BEHAVIOR  
ROSWELL PARK COMPREHENSIVE CANCER CENTER  
BUFFALO, NY 14263

MUMBA, MERCY N, PHD  
ASSOCIATE PROFESSOR  
CAPSTONE COLLEGE OF NURSING  
THE UNIVERSITY OF ALABAMA  
TUSCALOOSA, AL 35401

STATON, MICHELE, PHD  
PROFESSOR  
DEPARTMENT OF BEHAVIORAL SCIENCES  
COLLEGE OF MEDICINE  
UNIVERSITY OF KENTUCKY  
LEXINGTON, KY 40536

**MEETING ROSTER**  
**Interventions to Prevent and Treat Addictions Study Section**  
**Risk, Prevention and Health Behavior Integrated Review Group**  
**CENTER FOR SCIENTIFIC REVIEW**  
**IPTA**  
**06/22/2023 - 06/23/2023**

**Notice of NIH Policy to All Applicants:** Meeting rosters are provided for information purposes only. Applicant investigators and institutional officials must not communicate directly with study section members about an application before or after the review. Failure to observe this policy will create a serious breach of integrity in the peer review process, and may lead to actions outlined in [NOT-OD-22-044](#), including removal of the application from immediate review.

STORMSHAK, ELIZABETH A, PHD  
PROFESSOR  
COLLEGE OF EDUCATION  
PREVENTION SCIENCE INSTITUTE  
UNIVERSITY OF OREGON  
EUGENE, OR 97403

VILARDAGA, ROGER, PHD  
ASSOCIATE PROFESSOR  
DEPARTMENT OF PSYCHIATRY AND BEHAVIORAL  
SCIENCES  
SCHOOL OF MEDICINE  
DUKE UNIVERSITY  
DURHAM, NC 27710

WATKINS, KATHERINE E, MSHS, MD \*  
SENIOR SCIENTIST  
HEALTH CARE DIVISION  
RAND CORPORATION  
SANTA MONICA, CA 90407

WELSH, JUSTINE WITTENAUER, MD \*  
DIRECTOR OF THE EMORY HEALTHCARE ADDICTION  
SERVICES  
DEPARTMENT OF PSYCHIATRY AND BEHAVIORAL  
SCIENCES  
SCHOOL OF MEDICINE  
EMORY UNIVERSITY  
ATLANTA, GA 30307

YI, RICHARD, PHD  
PROFESSOR AND DIRECTOR  
COFRIN LOGAN CENTER FOR ADDICTION RESEARCH  
AND TREATMENT  
DEPARTMENT OF PSYCHOLOGY  
UNIVERSITY OF KANSAS  
LAWRENCE, KS 66045

**MAIL REVIEWER(S)**

D'SOUZA, DEEPAK CYRIL, MD  
PROFESSOR  
DEPARTMENT OF PSYCHIATRY  
YALE UNIVERSITY  
WEST HAVEN, CT 06516

**SCIENTIFIC REVIEW OFFICER**

VIDAL, SARAH, PHD  
SCIENTIFIC REVIEW OFFICER  
CENTER FOR SCIENTIFIC REVIEW  
NATIONAL INSTITUTES OF HEALTH  
BETHESDA, MD 20892

**EXTRAMURAL SUPPORT ASSISTANT**

AMARE, MERON ERMIA  
LEAD EXTRAMURAL SUPPORT ASSISTANT  
CENTER FOR SCIENTIFIC REVIEW  
NATIONAL INSTITUTES OF HEALTH  
BETHESDA, MD 20892

\* Temporary Member. For grant applications, temporary members may participate in the entire meeting or may review only selected applications as needed.

Consultants are required to absent themselves from the room during the review of any application if their presence would constitute or appear to constitute a conflict of interest.
